# Supplementary material for: Factors associated with the clinical outcome of patients with relapsed/refractory CD19+ acute lymphoblastic leukemia treated with ARI-0001 CART19-cell therapy
Source: PubMed Central journal article supplement — J Immunother Cancer. 2021 Dec 14;9(12):e003644. doi: 10.1136/jitc-2021-003644 (PMC8671976; doi:10.1136/jitc-2021-003644), 2021-12-14
Supplement: jitc-2021-003644supp001.pdf [file jitc-2021-003644supp001.pdf]

## SUPPLEMENTARY APPENDIX

### Factors associated with the clinical outcome of patients with relapsed/refractory CD19<sup>+</sup> acute lymphoblastic leukemia treated with ARI-0001 CART19-cell therapy

Valentín Ortiz-Maldonado et al.

#### SUPPLEMENTARY TABLES

##### Supplementary Table 1: Baseline characteristics of patients with relapsed-refractory acute lymphoblastic leukemia who received ARI-0001 cell therapy

| Characteristic                                    | n = 53    |
|---------------------------------------------------|-----------|
| Age in years, median (range)                      | 30 (3-68) |
| Female sex, n (%)                                 | 24 (54)   |
| Presence of Philadelphia chromosome, n (%)        | 6 (11)    |
| Prior lines of therapy, median (range)            | 4 (2-8)   |
| Prior IO, n (%)                                   | 28 (53)   |
| Prior blinatumomab, n (%)                         | 12 (23)   |
| Prior alloHCT, n (%)                              | 42 (79)   |
| Measurable disease at screening, n (%)            | 42 (79)   |
| Extramedullary disease, n (%)                     | 19 (36)   |
| ≥ 5% blasts in the bone marrow, n (%)             | 22 (42)   |
| CNS disease, n (%)                                | 7 (13)    |
| Follow-up in months from infusion, median (range) | 19 (3-40) |

Abbreviations: IO, inotuzumab ozogamicin; alloHCT, allogeneic hematopoietic cell transplantation; CNS, central nervous system.

**Supplementary Table 2: Subgroup analysis of efficacy of ARI-0001 cells in patients with acute lymphoblastic leukemia**

| Population           | n  | Progression-free survival                 |                                     | Overall survival                        |                                     |
|----------------------|----|-------------------------------------------|-------------------------------------|-----------------------------------------|-------------------------------------|
|                      |    | Median (95% CI)<br>2-year rate (95% CI)   | Univariate HR<br>(95% CI), p value* | Median (95% CI)<br>2-year rate (95% CI) | Univariate HR<br>(95% CI), p value* |
| Total                | 53 | 13.52 mo (7.14-NA)<br>32.9% (20.6-52.6%)  |                                     | 29.2 mo (15.0-NA)<br>53.9% (40.5-71.8%) |                                     |
| Single dose          | 15 | 14.4 mo (6.94-NA)<br>26.7% (11.5-61.7%)   |                                     | 29.2 mo (11.5-NA)<br>53.3% (33.2-85.6%) |                                     |
| Fractionated         | 38 | 13.5 mo (5.3-NA)<br>42.0% (27.5-64.2%)    | 0.88 (0.41-1.86), p<br>= 0.73       | NA (14.5-NA)<br>54.4% (38.4-77.1%)      | 0.91 (0.36-2.31), p<br>= 0.84       |
| < 25 years           | 20 | 17.53 mo (13.52-NA)<br>31.6% (14.5-68.9%) |                                     | 29.2 mo (15.8-NA)<br>57.2% (38.4-85.1%) |                                     |
| ≥ 25 years           | 33 | 7.83 mo (5.23-NA)<br>37.6% (23-61.6%)     | 1.34 (0.64-2.81), p<br>= 0.59       | NA (11.5-NA)<br>53.4% (36.7-77.8%)      | 1.25 (0.52-3.01), p<br>= 0.84       |
| < 5% blasts<br>in BM | 31 | NA (7.14-NA)<br>52.5% (36.4-75.7%)        |                                     | NA (29.2-NA)<br>72% (56.2-92.2%)        |                                     |
| ≥ 5% blasts<br>in BM | 22 | 9.38 mo (3.45-NA)<br>10.7% (2.1-54.4%)    | 2.14 (1.04-4.42), p<br>= 0.077      | 15.4 mo (10.4-NA)<br>33.4% (17.6-63.5%) | 2.55 (1.06-6.17), p<br>= 0.134      |
| Loss of BCA          | 53 |                                           | 4.41 (1.59-12.21), p<br>= 0.0172    |                                         | 1.28 (0.44-3.68), p<br>= 0.84       |

Abbreviations: BM, bone marrow; IO, inotuzumab ozogamicin; alloHCT, allogeneic hematopoietic cell transplantation; BCA, B-cell aplasia; CI, confidence interval; mo, months; NA, not available/not reached; HR, hazard ratio.

\*Adjusted according to Benjamini-Hochberg method

### Supplementary Table 3: Landmark analyses evaluating the impact of loss of B-cell aplasia at different time points

| Population            | n  | Progression-free survival               |                                    |
|-----------------------|----|-----------------------------------------|------------------------------------|
|                       |    | Median (95% CI)<br>2-year rate (95% CI) | Univariate HR<br>(95% CI), p value |
| Loss of BCA<br>< 3 mo | 15 | 11.4 (1.14-NE)<br>22.5% (8.4-60.3%)     | 1.83 (0.82-4.11), p<br>= 0.15      |
| Loss of BCA<br>≥ 3 mo | 30 | 15.5 mo (6.38-NE)<br>49.3% (32.5-74.8%) |                                    |
| Loss of BCA<br>< 6 mo | 17 | 17.1 (8.38-NE)<br>43.5% (23.0-82.2%)    | 1.39 (0.45-4.28), p<br>= 0.56      |
| Loss of BCA<br>≥ 6 mo | 15 | NE (7.52-NE)<br>55.3% (31.2-98.0%)      |                                    |

Abbreviations: BCA, B-cell aplasia; CI, confidence interval; NE, not estimable; HR, hazard ratio.

## SUPPLEMENTARY FIGURES

Supplementary Figure 1: Diagram of ARI-0001 chimeric antigen receptor construct

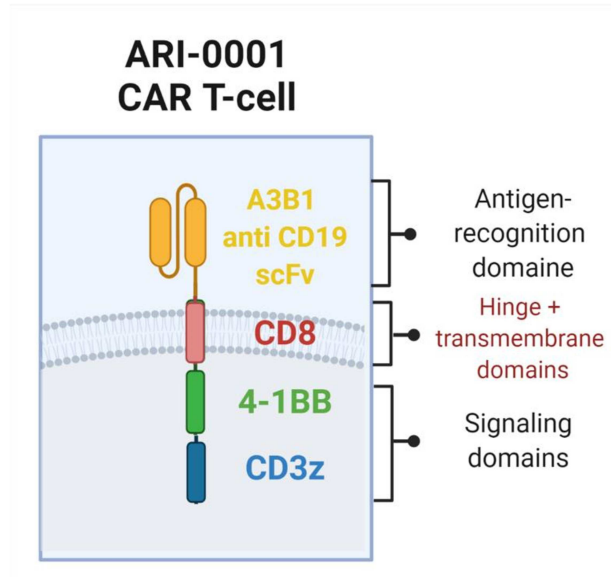

Supplementary Figure 2: Diagram of the lymphodepleting chemotherapy and ARI-0001 cells infusion used in the CART19-BE-01 clinical trial and subsequent compassionate use program

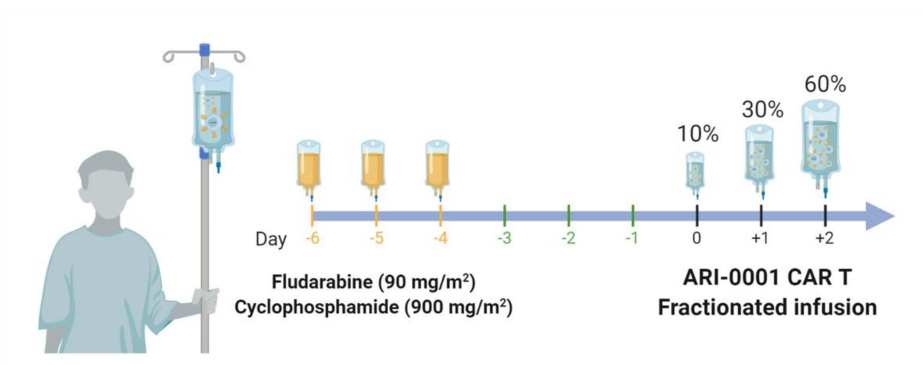

## Supplementary Figure 3: Patients' disposition

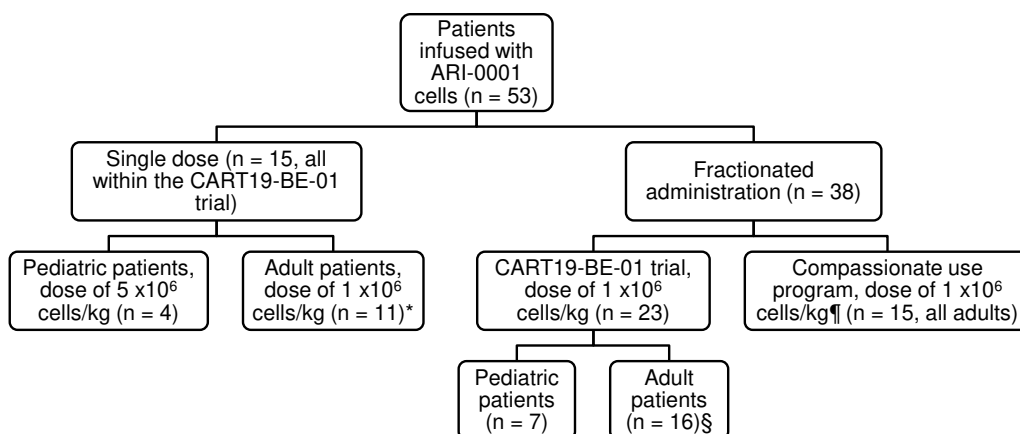

\*The first patient ever treated with ARI-0001 cells only received  $0.5 \times 10^6$  cells/kg as mandated by the Spanish Medicines Agency.

§One adult patient recruited into the CART19-BE-01 trial received  $0.4 \times 10^6$  cells/kg because of cytokine release syndrome after the second fraction.

¶Two adult patients recruited into the compassionate use program received  $0.1 \times 10^6$  cells/kg because of cytokine release syndrome after the first fraction.
